# Supplementary material for: Deep neural network analysis of nanoparticle ordering to identify defects in layered carbon materials
Source: Royal Society of Chemistry journal article supplement (doi:10.1039/d0sc05696k), 2021-01-01
Supplement: d0sc05696k1.pdf [file d0sc05696k1.pdf]

*Supporting information*

## **Deep neural network analysis of nanoparticle ordering to identify defects in layered carbon materials**

Daniil A. Boiko  
Evgeniy O. Pentsak  
Vera A. Cherepanova  
Evgeniy G. Gordeev  
Valentine P. Ananikov\*

### **Contents**

|                                                                |           |
|----------------------------------------------------------------|-----------|
| <b>Role of amount and distribution of defects .....</b>        | <b>2</b>  |
| <b>Monte-Carlo simulations: non-uniform surface case .....</b> | <b>2</b>  |
| <b>Monte-Carlo simulations: smooth surface case .....</b>      | <b>5</b>  |
| <b>Degree of order determination .....</b>                     | <b>7</b>  |
| <b>Classification neural network.....</b>                      | <b>8</b>  |
| <b>Training .....</b>                                          | <b>8</b>  |
| <b>Model interpretation .....</b>                              | <b>10</b> |
| <b>Human evaluation .....</b>                                  | <b>11</b> |
| <b>Segmentation neural network .....</b>                       | <b>14</b> |
| <b>Training details .....</b>                                  | <b>14</b> |
| <b>References .....</b>                                        | <b>15</b> |

Zelinsky Institute of Organic Chemistry, Russian Academy of Sciences, Leninsky Pr. 47, Moscow 119991, Russia; val@ioc.ac.ru

## Role of type, amount and distribution of defects

**Table S1.** References for importance of determination of type, amount and distribution of defects.

| Area                | Role of defects                                                   | Defining characteristic of defects                             | Ref. |
|---------------------|-------------------------------------------------------------------|----------------------------------------------------------------|------|
| Electronic devices  | tune the bandgap, electronic properties, and transport properties | density and distribution of defects                            | 1    |
|                     | define electronic and mechanical properties                       | characteristics of grain boundaries                            | 2–4  |
|                     | define transport ability in the vicinity of the Fermi level       | presence localized states introduced by grain boundaries       | 5    |
|                     | define mechanical strength                                        | location, number and size of grain boundaries and void defects | 6–8  |
| Carbocatalysts      | carbocatalysis of hydrogenation                                   | type of defects (Stone-Wales defects)                          | 9    |
|                     | carbocatalysis of oxidative coupling reaction                     | type of defects (structural defects)                           | 10   |
|                     | carbocatalysis of reductive hydrogen atom transfer reactions      | type of defects (localized $\pi$ -edge states)                 | 11   |
| Supported catalysts | reduce leaching                                                   | binding strength                                               | 12   |
|                     | prevention of agglomeration                                       | size of the defect, binding strength                           | 12   |
|                     | provide charge transfer between metal and support                 | binding strength                                               | 12   |
|                     | define stability of carbon supports                               | amount, distribution and type of defects                       | 13   |

## Monte-Carlo simulations: non-uniform surface case

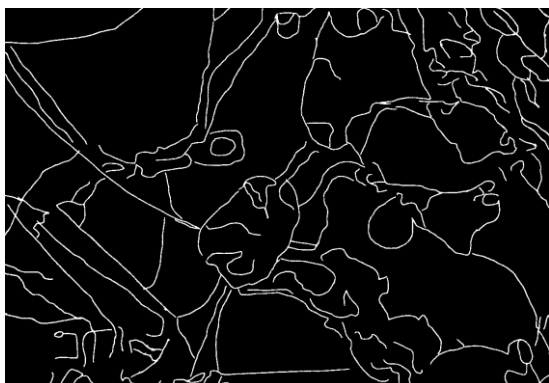

**Fig. S1.** Mask of reactive areas

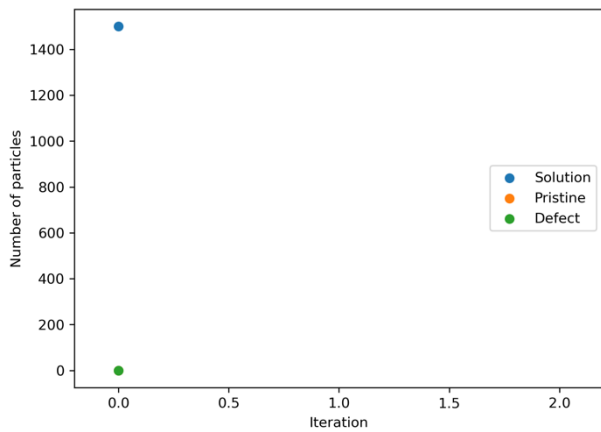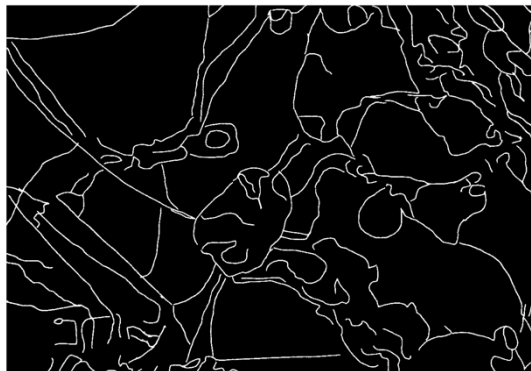

**Fig. S2.** The initial state of the system

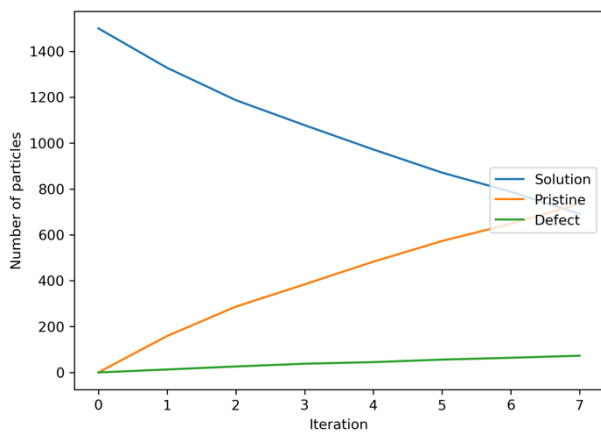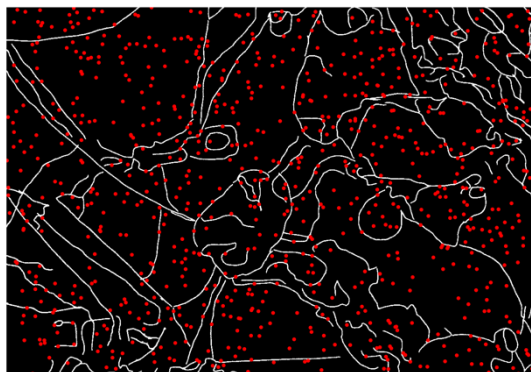

**Fig. S3.** The simulation after 7 iterations

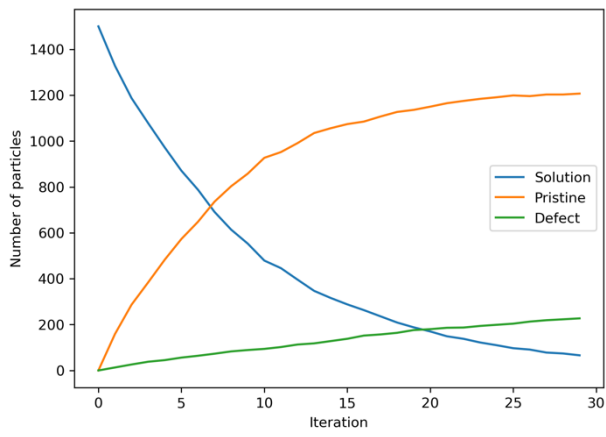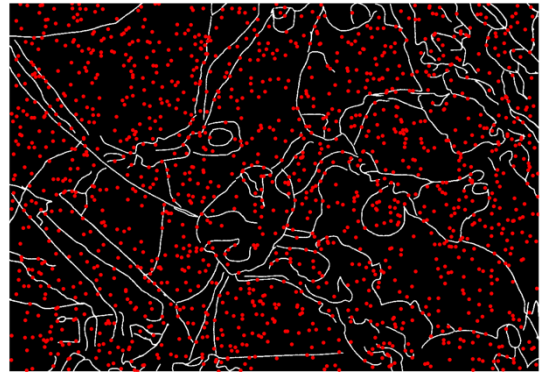

**Fig. S4.** The simulation after 29 iterations

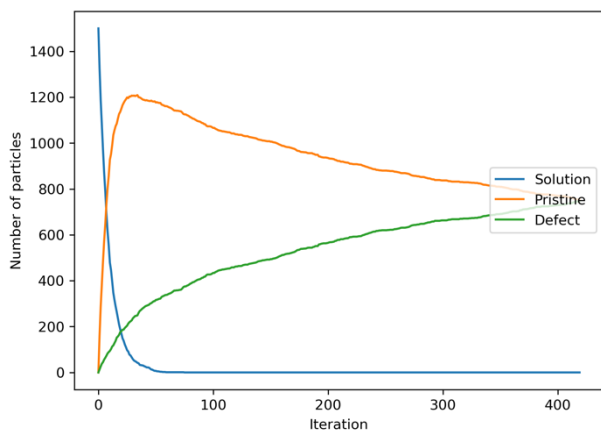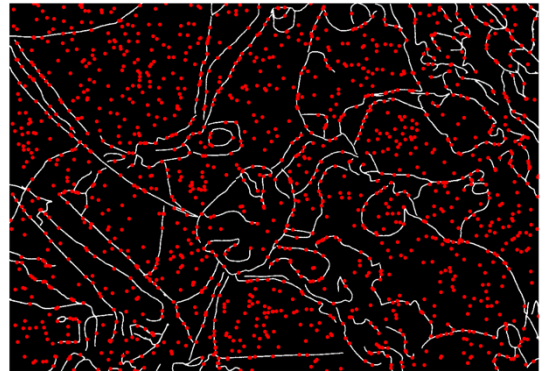

**Fig. S5.** The simulation after 419 iterations

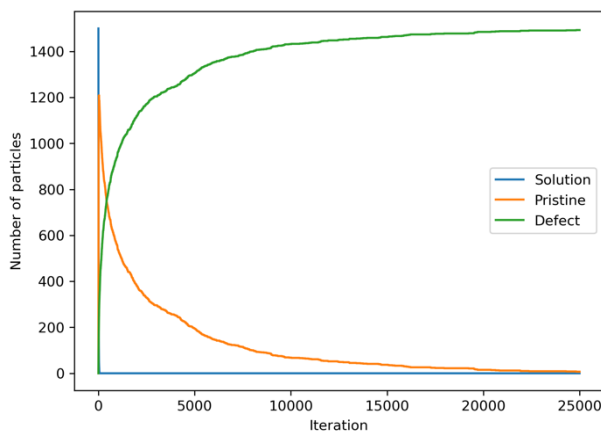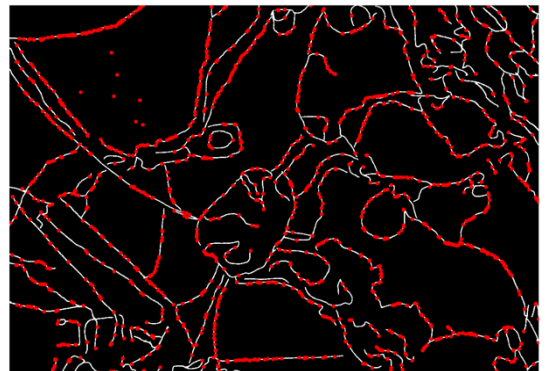

**Fig. S6.** The simulation after 25 000 iterations

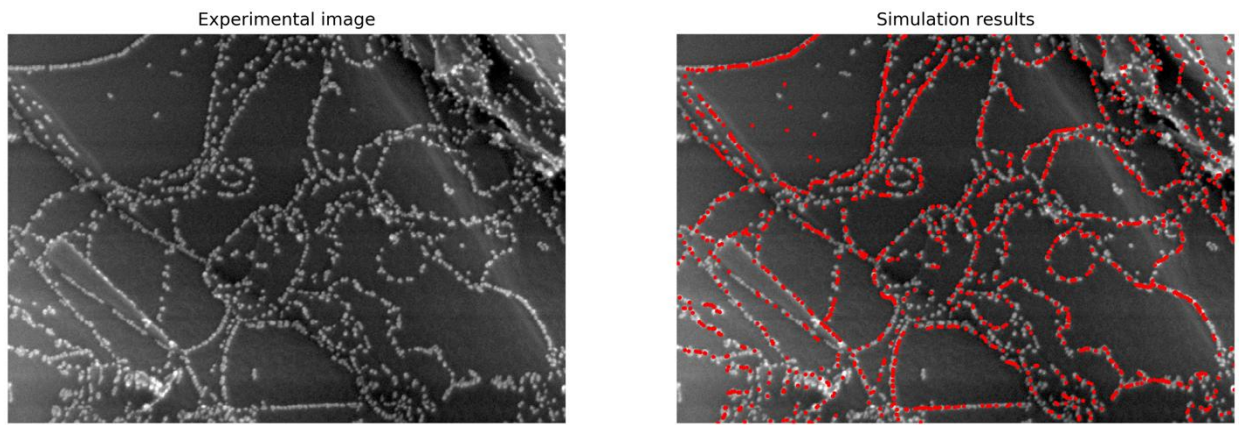

**Fig. S7.** The comparison between experimental image and results of the simulation

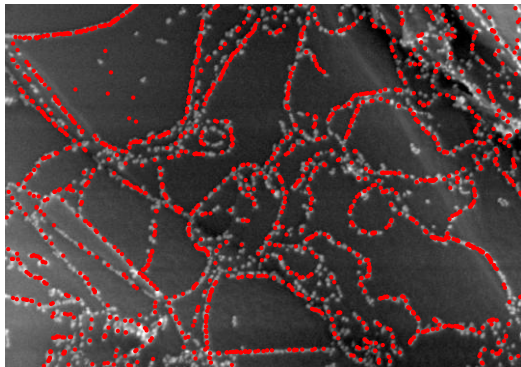

**Fig. S8.** Experimental image with overlaid simulation results

Video movie reflecting the simulation process is available in the [Movie-1.mp4](#) file.

## Monte-Carlo simulations: smooth surface case

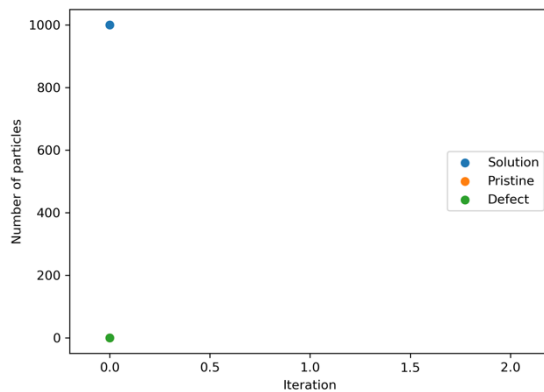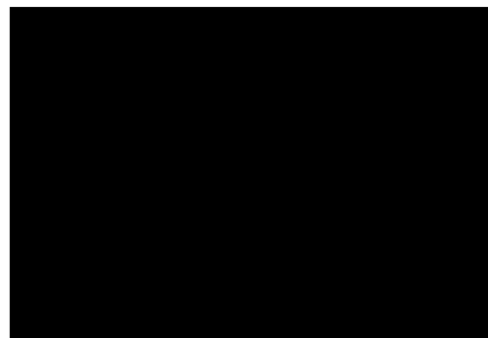

**Fig. S9.** The initial state of the system

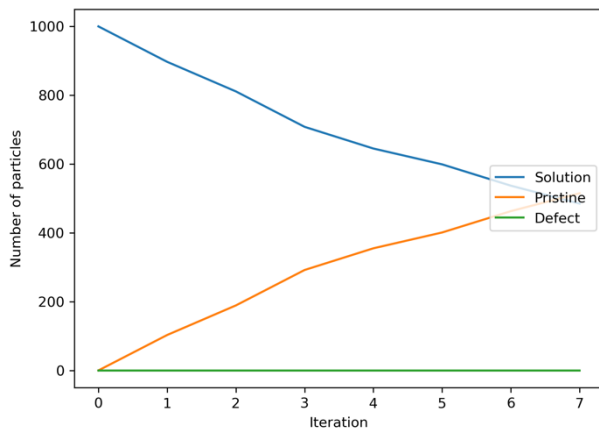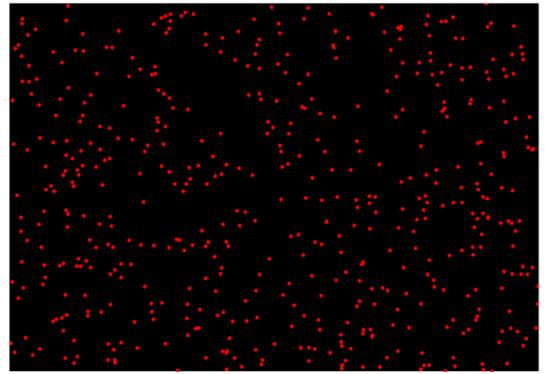

**Fig. S10.** The simulation after 7 iterations

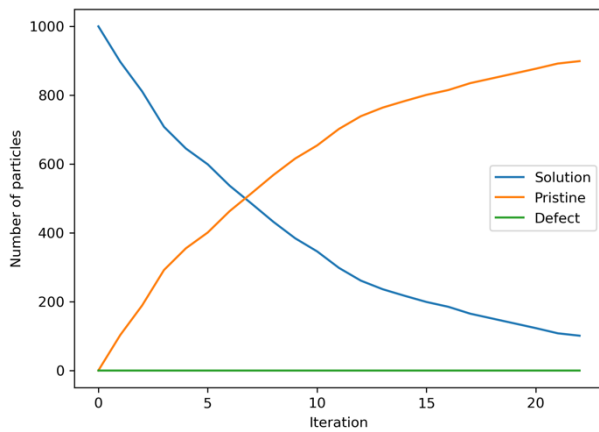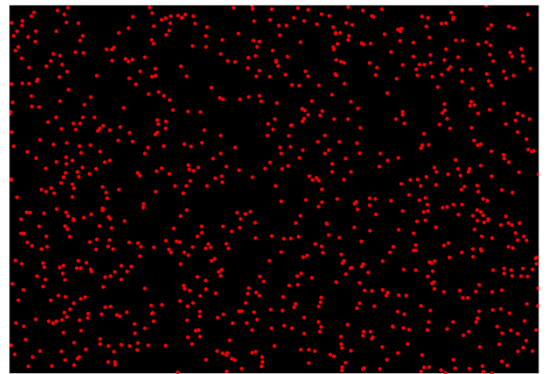

**Fig. S11.** The simulation after 22 iterations

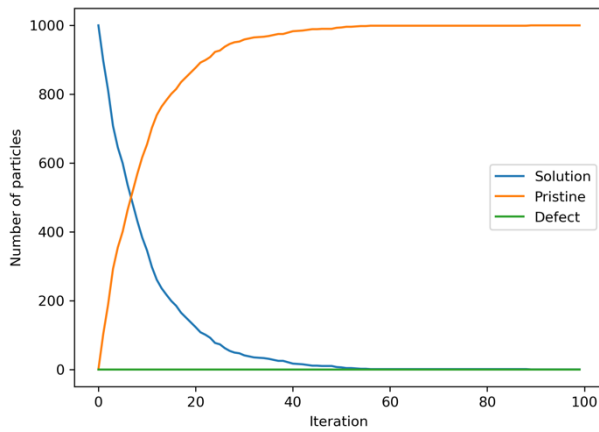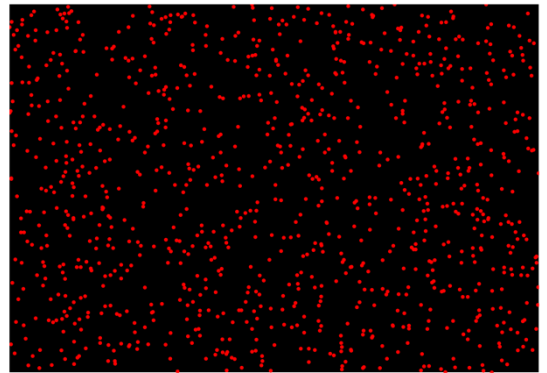

**Fig. S12.** The simulation after 100 iterations

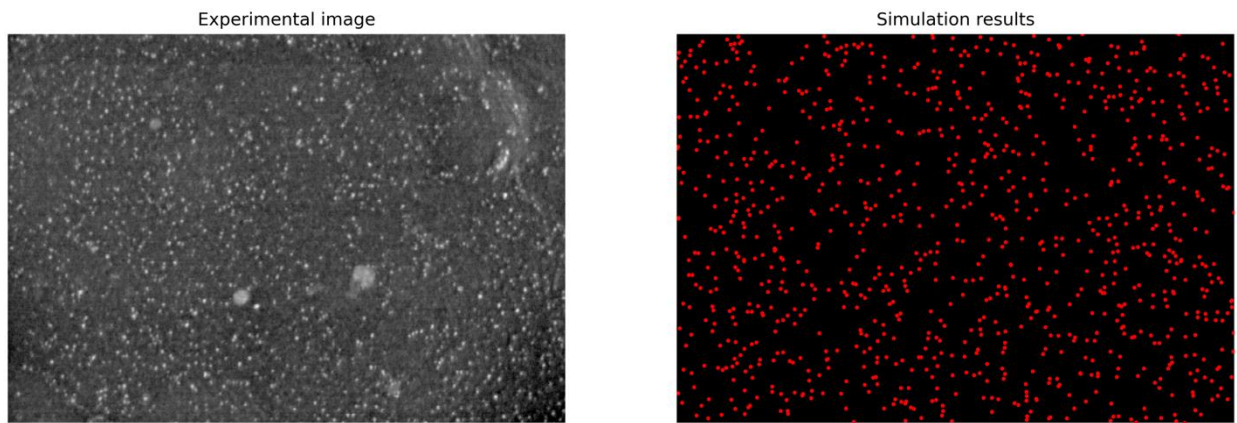

**Fig. S13.** The comparison between experimental image and results of the simulation

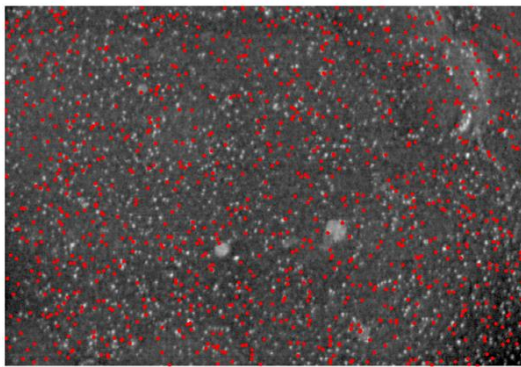

**Fig. S14.** Experimental image with overlaid simulation results

**Video movie reflecting the simulation process is available in the Movie-2.mp4 file.**

## Degree of order determination

The degree of order can be determined by finding particle positions first and then checking whether these positions were drawn from 2D uniform distribution. This was done using one-sample two-dimensional Kolmogorov-Smirnov test.<sup>14</sup>

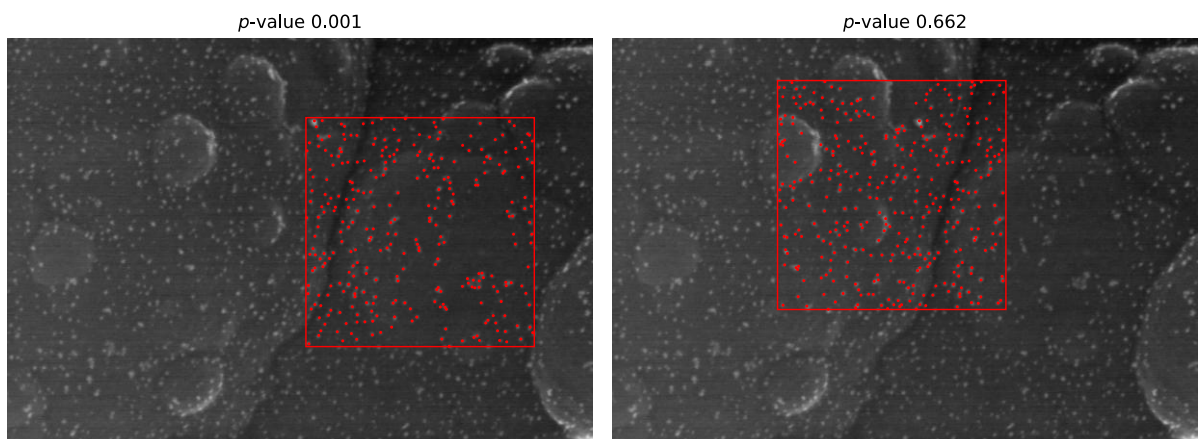

**Fig. S15.** Two patches of the image of the disordered material showing different degree of order

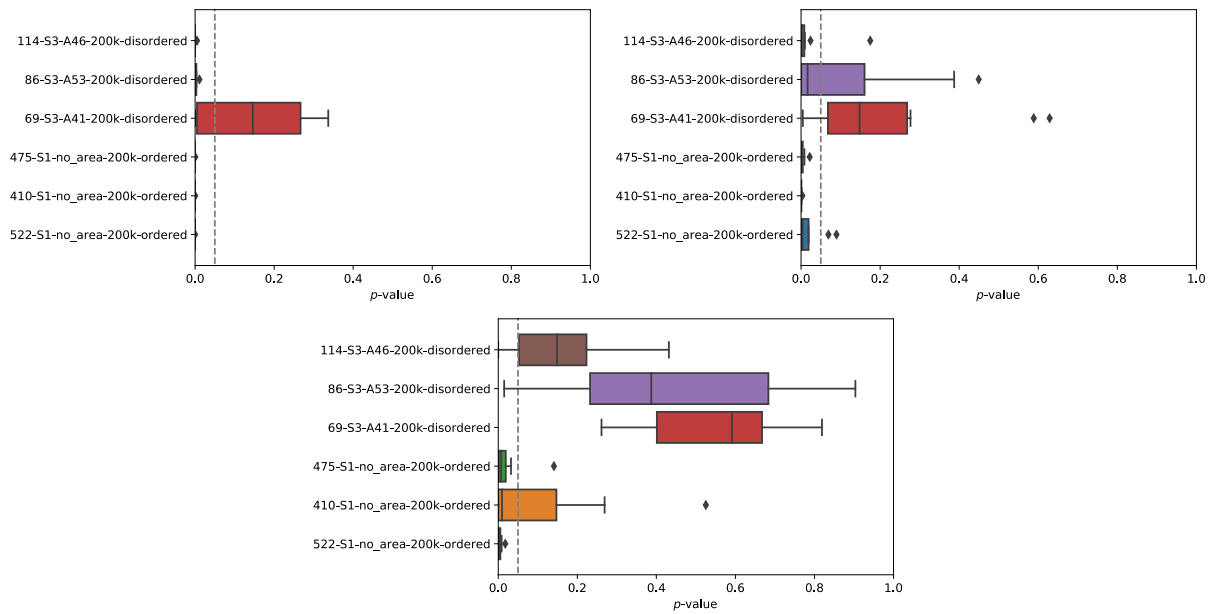

**Fig. S16.** Distribution of  $p$ -values for 10 sample patches in multiple ordered and disordered images. Top left 750 px, top right 500 px, bottom 250 px. Image names are the same as in previously published dataset<sup>15</sup>

Large variation of the results confirms need for more robust methods for determination of degree of order.

## Classification neural network

### Training

Model was trained on 227x227 patches of the images provided in the dataset.<sup>16</sup>

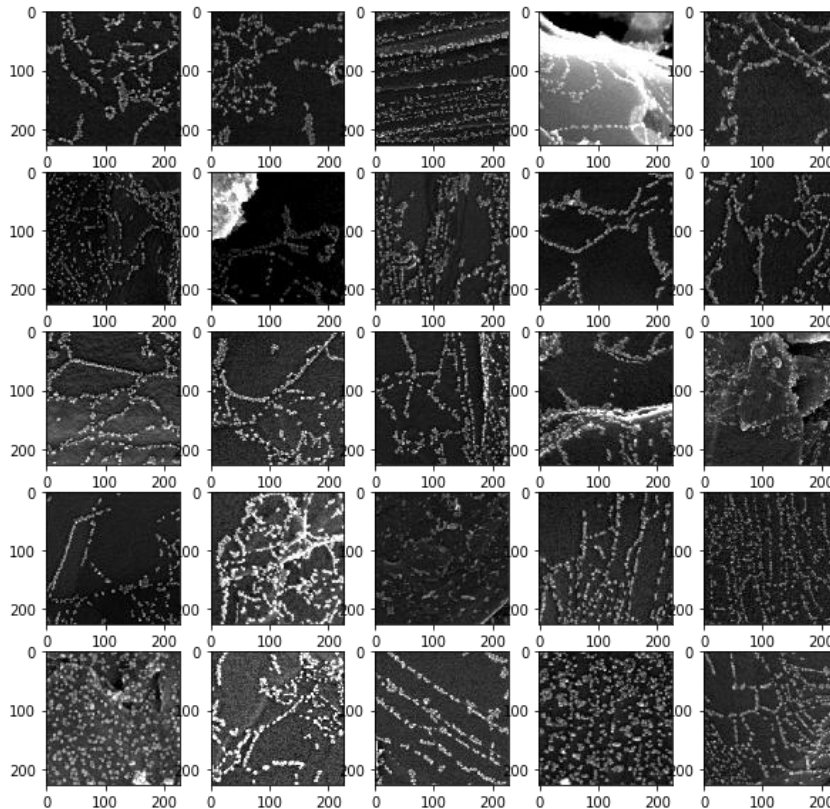

**Fig. S17.** Example of training images



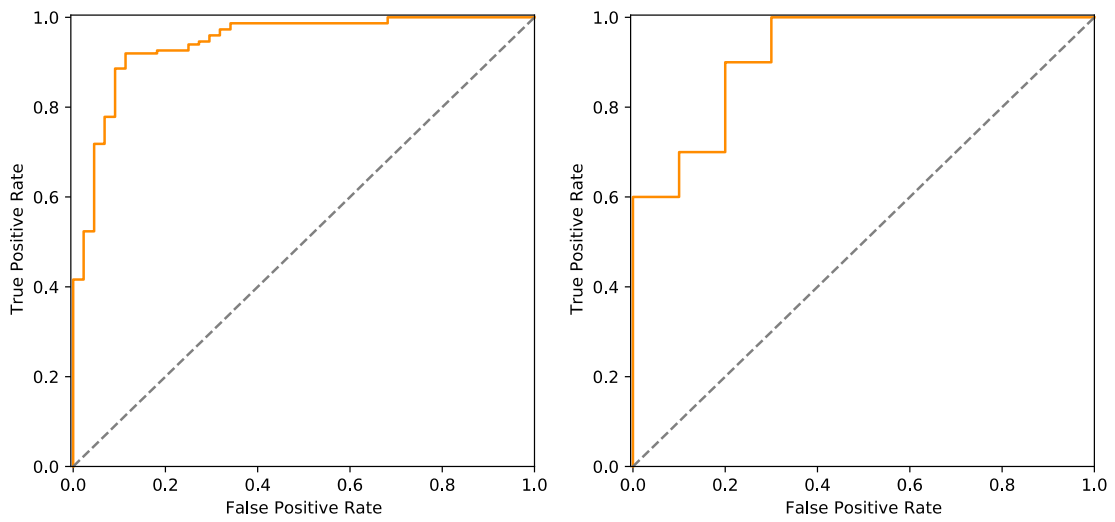

**Fig. S18.** ROC-curves for AlexNet model (left — whole validation dataset, right — human evaluation dataset)

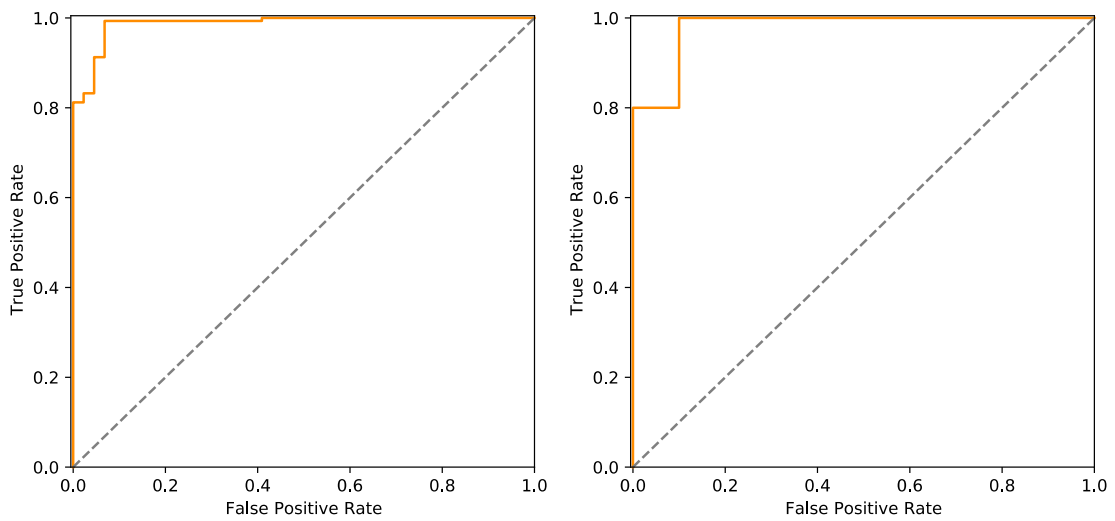

**Fig. S19.** ROC-curves for ResNet model (left — whole validation dataset, right — human evaluation dataset)

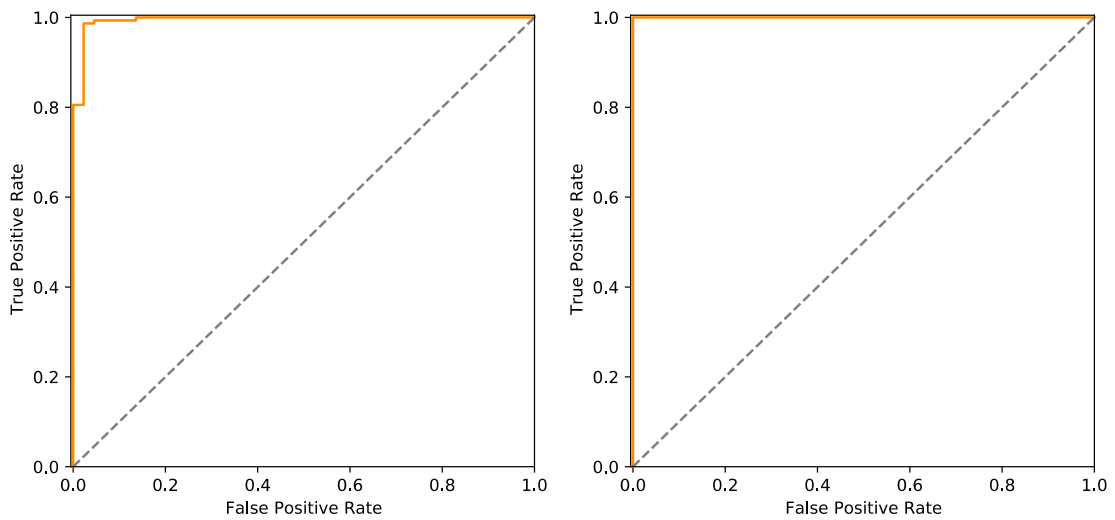

**Fig. S20.** ROC-curves for VGG model (left — whole validation dataset, right — human evaluation dataset)

## Model interpretation

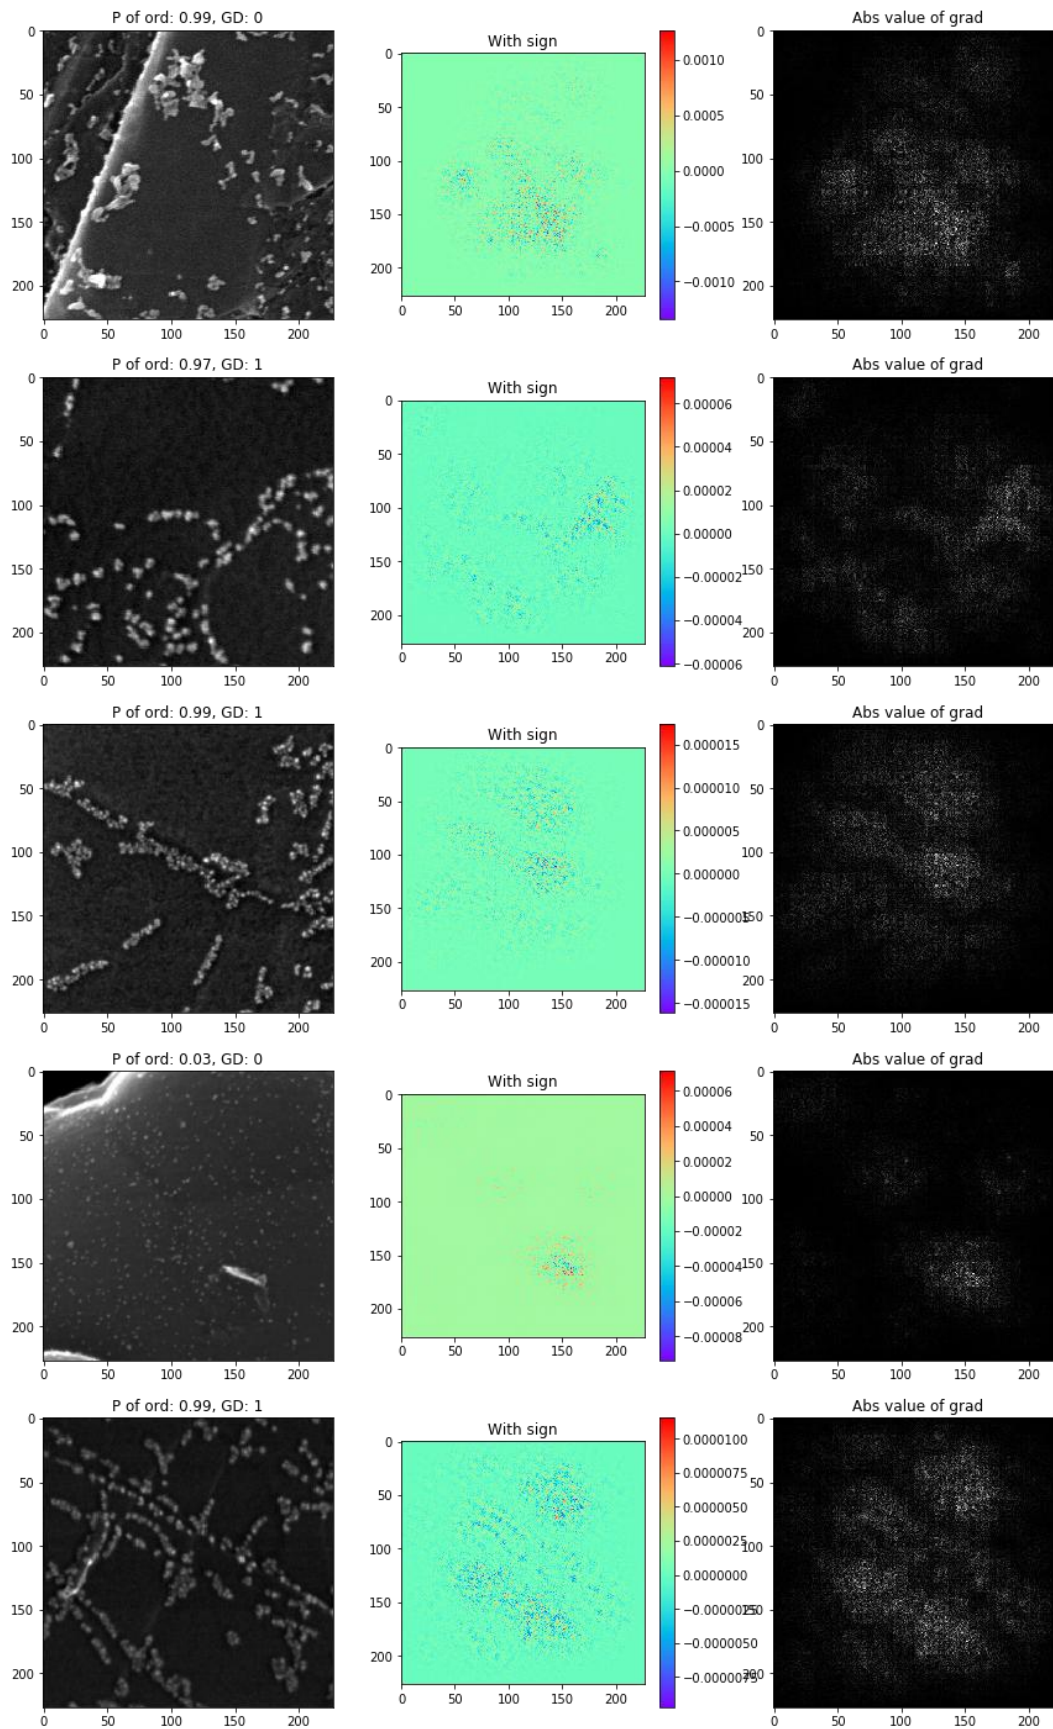

**Fig. S21.** Validation dataset: gradients of loss function with respect to the image. Left — source images, middle — gradients, right — absolute value of gradients

## Human evaluation

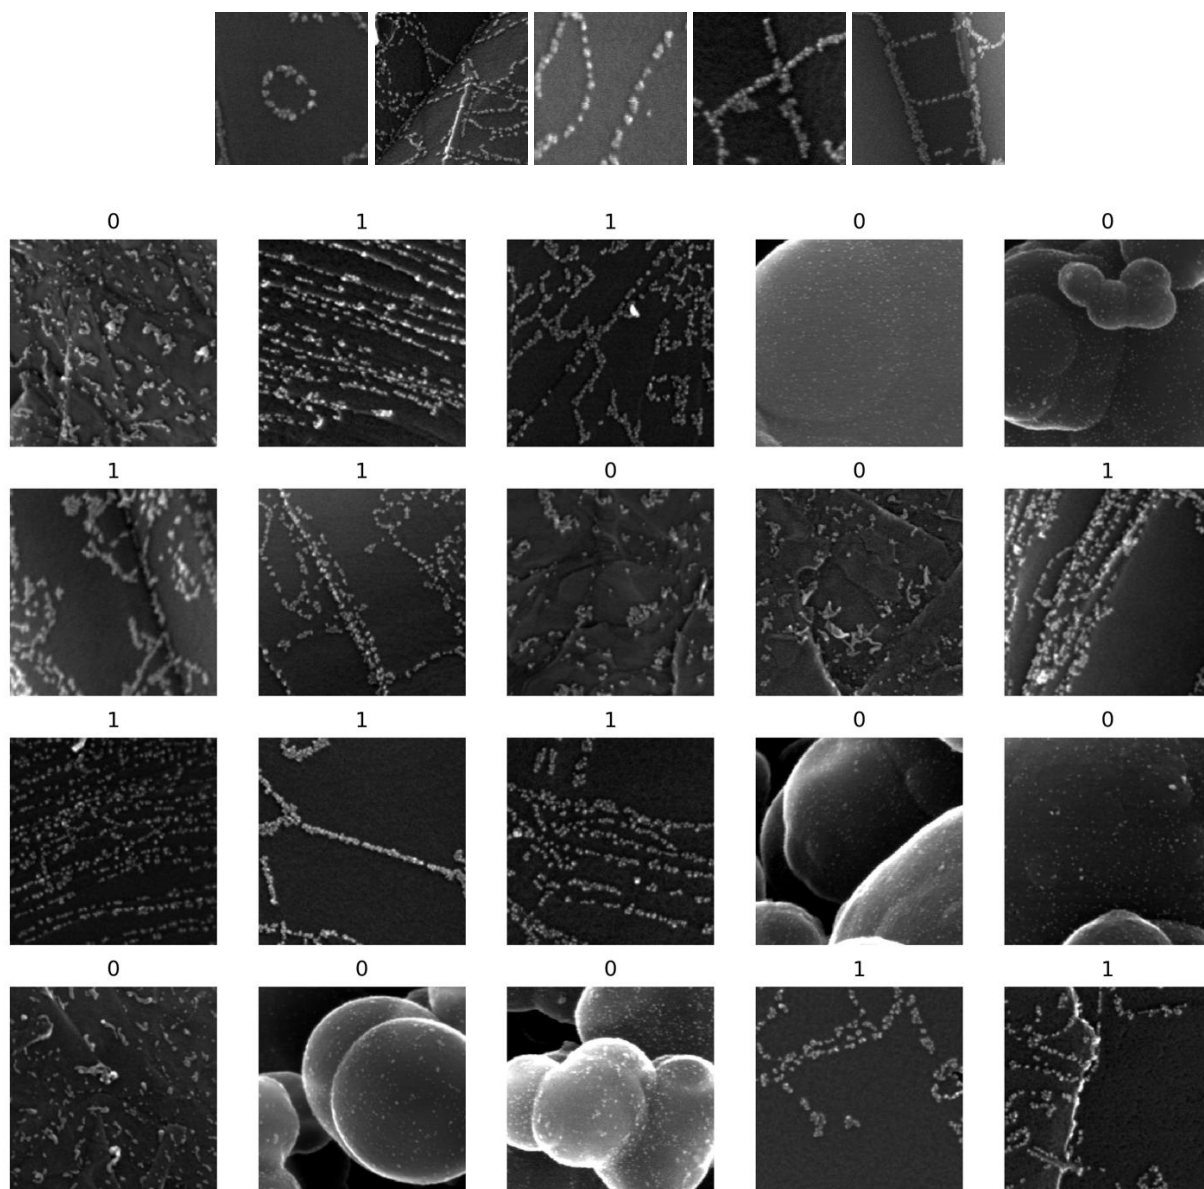

**Fig. S22.** Images selected for human evaluation (test images are shown on top). "1" — ordered, "0" — disorderd

Human training was performed using following images:

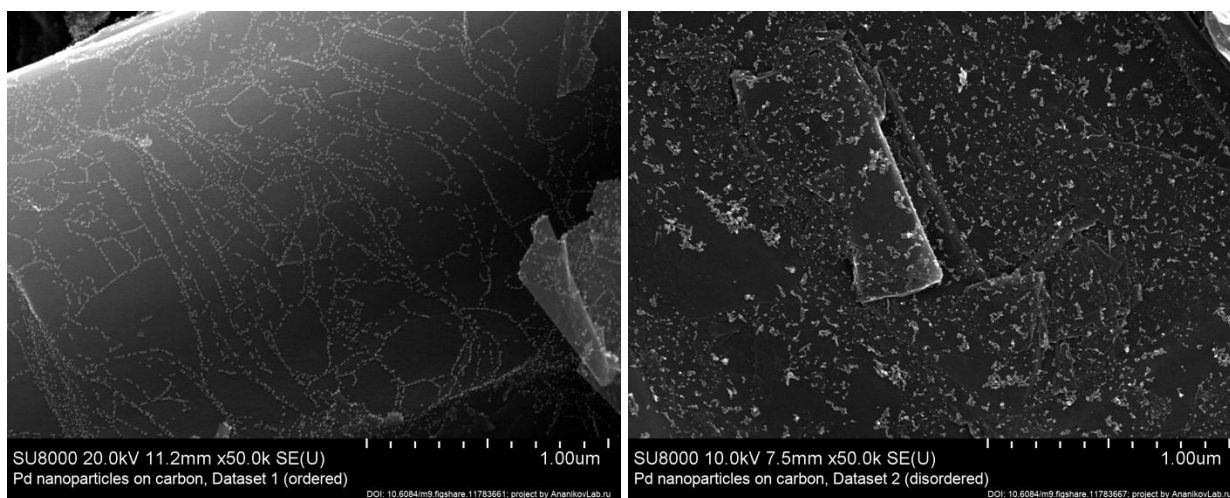

**Fig. S23.** Images, used to train humans (ordered location of nanoparticles – left; disordered – right)

The images were accompanied with a description of what we mean by order, where the nanoparticles are, and how to classify properly.

It was assumed, that some people would not read/understand the description and the task properly. To identify these answers, we included five very simple cases of images with high degree of order. Respondents' performance in these questions is shown below. In overall, 245 people were involved.

**Table S2.** Percentage of people who answered correctly to the test questions

| Question / metric  | Correct answers |
|--------------------|-----------------|
| 1                  | 87.8%           |
| 2                  | 96.3%           |
| 3                  | 94.7%           |
| 4                  | 93.1%           |
| 5                  | 98.0%           |
| All test questions | 79.6%           |

Then we calculated percentage of correct answers and classification metrics for all the respondents and for the people, who answered all test questions correctly, i.e. passed the test.

**Table S3.** Poll statistics by question/metric (passing the test means answering correctly each of the first five test questions as summarized in Table S1)

| Question / metric | Correct answers from those responders, who did not pass test questions | Correct answers from those responders, who passed test questions |
|-------------------|------------------------------------------------------------------------|------------------------------------------------------------------|
| 6                 | 98.0%                                                                  | 98.5%                                                            |
| 7                 | 78.0%                                                                  | 90.8%                                                            |

|                 |       |       |
|-----------------|-------|-------|
| 8               | 50.0% | 73.3% |
| 9               | 80.0% | 93.3% |
| 10              | 86.0% | 94.4% |
| 11              | 22.0% | 48.7% |
| 12              | 62.0% | 93.8% |
| 13              | 98.0% | 97.4% |
| 14              | 98.0% | 97.4% |
| 15              | 78.0% | 80.5% |
| 16              | 90.0% | 95.4% |
| 17              | 82.0% | 99.5% |
| 18              | 68.0% | 89.7% |
| 19              | 80.0% | 94.9% |
| 20              | 82.0% | 95.4% |
| 21              | 96.0% | 97.4% |
| 22              | 84.0% | 93.8% |
| 23              | 86.0% | 92.3% |
| 24              | 62.0% | 88.2% |
| 25              | 46.0% | 76.9% |
| Precision score | 0.866 | 0.962 |
| Accuracy score  | 0.763 | 0.896 |
| Recall score    | 0.638 | 0.837 |

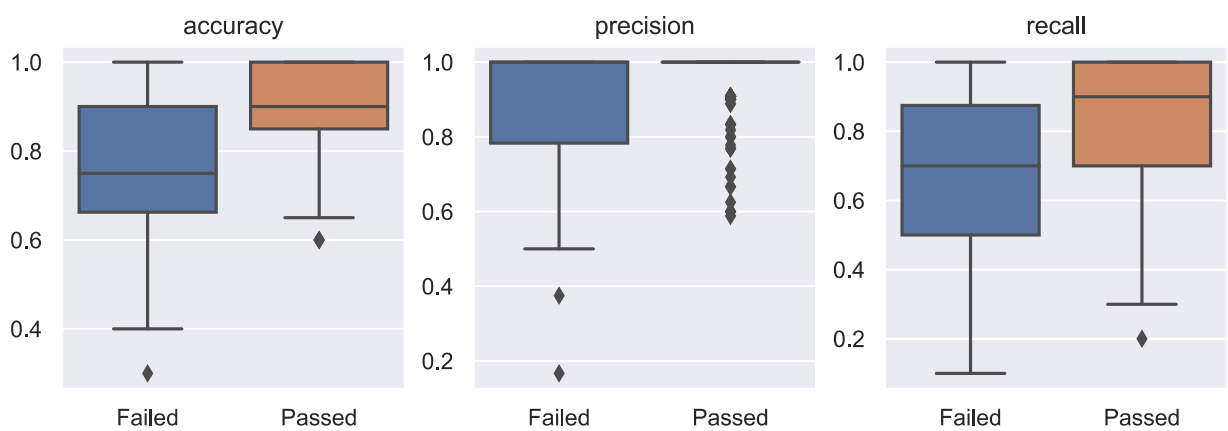

**Fig. S24.** Distribution of metrics for the poll responders

# Segmentation neural network

## Training details

Search for the architecture was done, using custom-build wrapper for Segmentation Models PyTorch package.<sup>17</sup> All network were trained, using Adam optimizer<sup>18</sup> with  $10^{-4}$  learning rate. The networks were trained on a single NVIDIA 1080 TI.

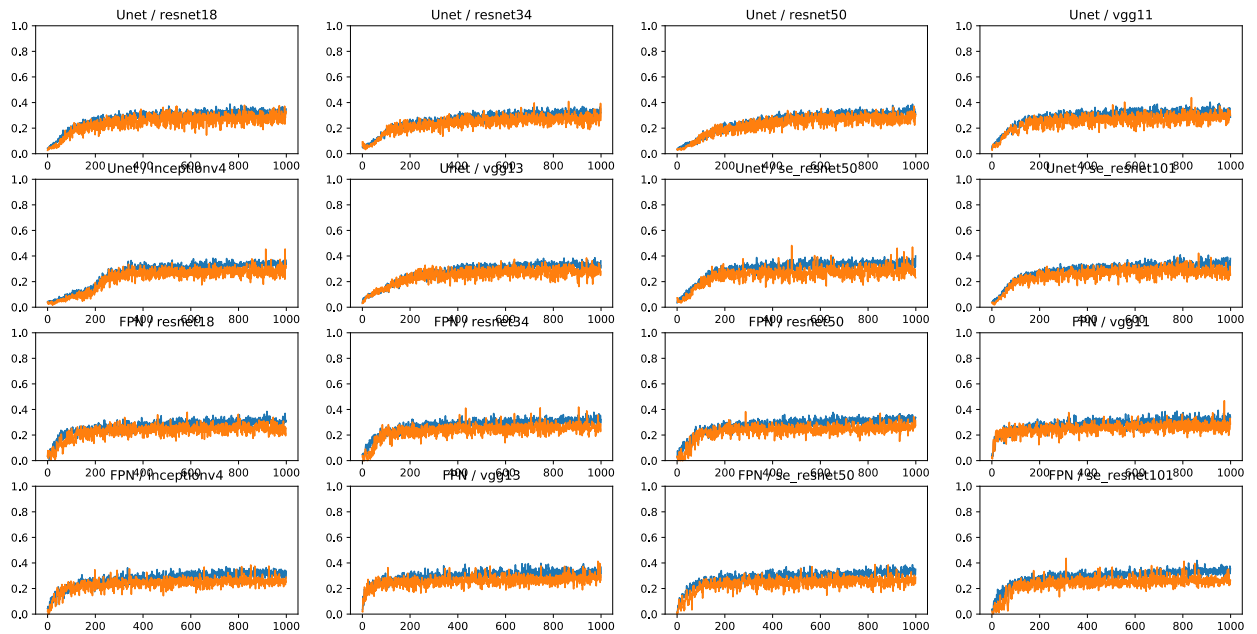

**Fig. S25.** Learning curves for models, evaluated during grid-search. Metric — ROC AUC score

Then the models were retrained but learning rate with lowered 10-fold every 750 epochs.

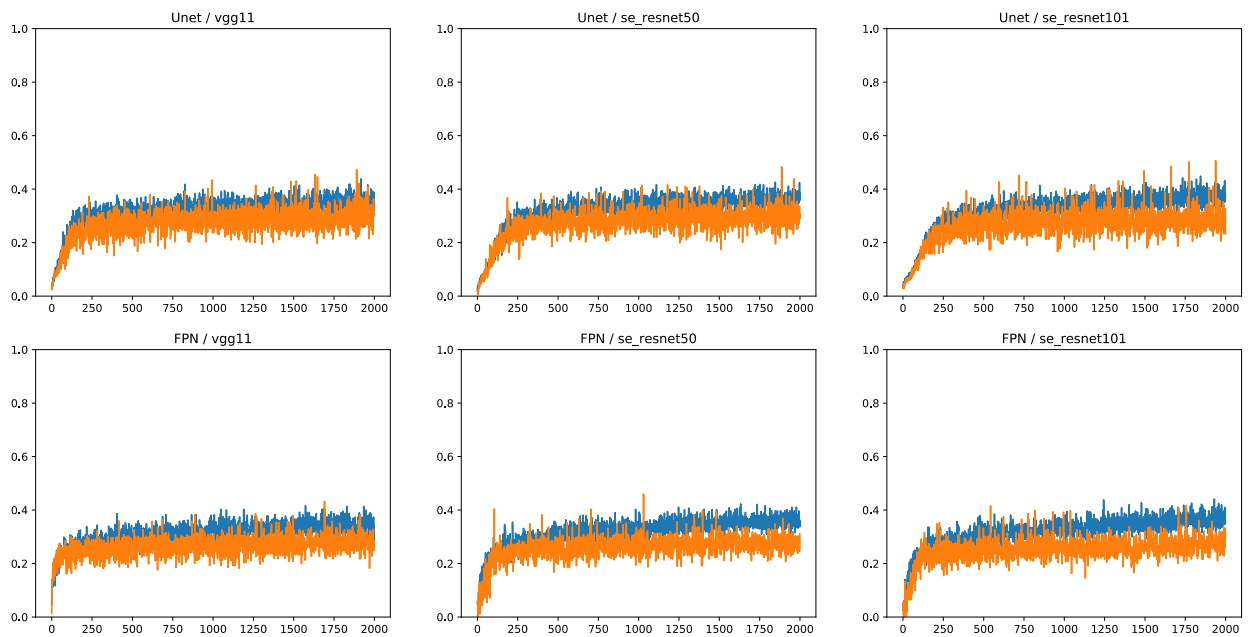

**Fig. S26.** Learning curves for the best models. Metric — ROC AUC score

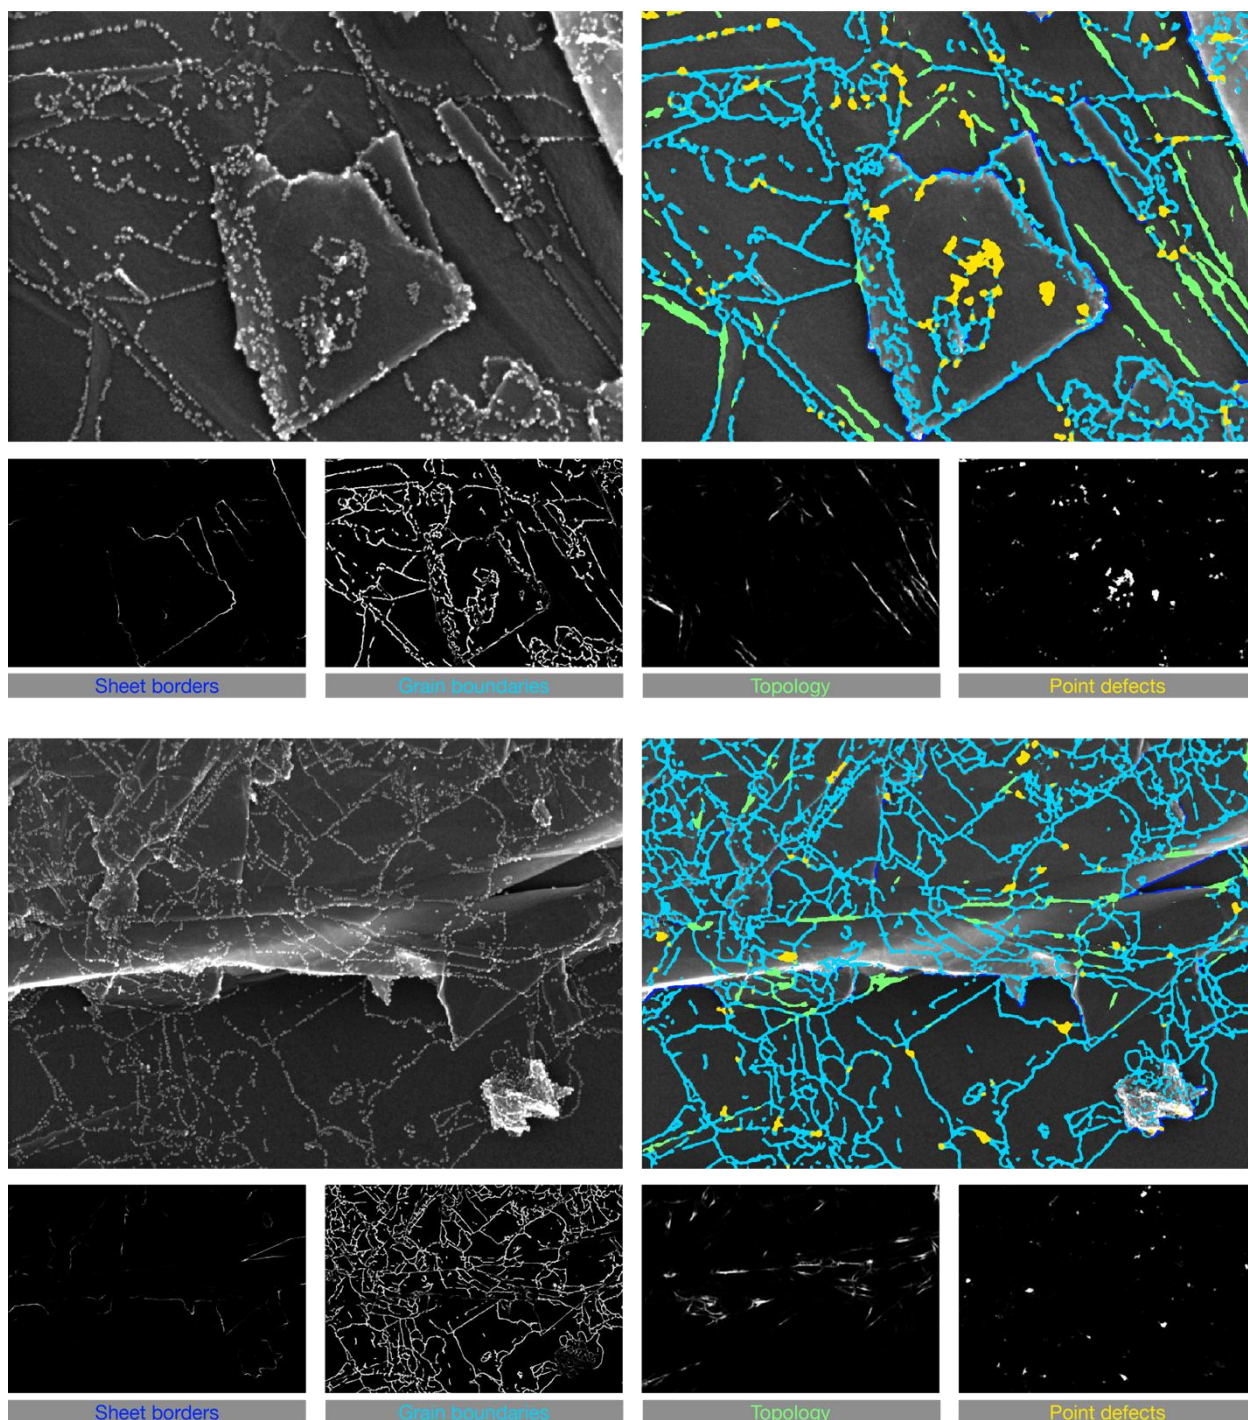

**Fig. S27.** Other examples of segmentation neural network outputs

## References

1. Shakeri, M. Effect of randomly distributed asymmetric stone-wales defect on electronic and transport properties of armchair graphene nanoribbon. *Superlattices Microstruct.* **128**, 116–126 (2019).
2. Tapasztó, L. *et al.* Mapping the electronic properties of individual graphene grain boundaries. *Appl. Phys. Lett.* **100**, 053114 (2012).
3. Zhang, J. & Zhao, J. Structures and electronic properties of symmetric and nonsymmetric graphene grain boundaries. *Carbon N. Y.* **55**, 151–159 (2013).

4. Ayuela, A., Jaskólski, W., Santos, H. & Chico, L. Electronic properties of graphene grain boundaries. *New J. Phys.* **16**, 083018 (2014).
5. Sun, J. *et al.* Electronic and transport properties of graphene with grain boundaries. *RSC Adv.* **6**, 1090–1097 (2016).
6. Jing, N. *et al.* Effect of defects on Young's modulus of graphene sheets: a molecular dynamics simulation. *RSC Adv.* **2**, 9124 (2012).
7. Zhang, J. & Zhao, J. Mechanical properties of bilayer graphene with twist and grain boundaries. *J. Appl. Phys.* **113**, 043514 (2013).
8. Park, Y. & Hyun, S. Size Effect of Defects on the Mechanical Properties of Graphene. *J. Korean Phys. Soc.* **72**, 681–686 (2018).
9. Yermakov, A. Y. *et al.* Hydrogen Dissociation Catalyzed by Carbon-Coated Nickel Nanoparticles: Experiment and Theory. *ChemPhysChem* **14**, 381–385 (2013).
10. Xie, J. *et al.* Reduced graphene oxide-catalyzed oxidative coupling reaction of 4-methoxyphenol in aerobic aqueous solution. *Carbon N. Y.* **121**, 418–425 (2017).
11. Savaram, K. *et al.* Dry microwave heating enables scalable fabrication of pristine holey graphene nanoplatelets and their catalysis in reductive hydrogen atom transfer reactions. *Carbon N. Y.* **139**, 861–871 (2018).
12. Luo, Z. & Khanna, S. N. Carbon-Carbon Cross-Coupling Reactions. in *Metal Clusters and Their Reactivity* 143–162 (Springer Singapore, 2020). doi:10.1007/978-981-15-9704-6\_9.
13. Huang, H. & Wang, X. Pd nanoparticles supported on low-defect graphene sheets: for use as high-performance electrocatalysts for formic acid and methanol oxidation. *J. Mater. Chem.* **22**, 22533 (2012).
14. Taillon, G. KS2D: 2 Dimensional Kolmogorov-Smirnov test for goodness-of-fit. *GitHub repository* (2021).
15. Boiko, D. A., Pentsak, E. O., Cherepanova, V. A. & Ananikov, V. P. Electron microscopy dataset for the recognition of nanoscale ordering effects and location of nanoparticles — Dataset 1 (ordered). doi:10.6084/m9.figshare.11704215.
16. Boiko, D. A., Pentsak, E. O., Cherepanova, V. A. & Ananikov, V. P. Electron microscopy dataset for the recognition of nanoscale ordering effects and location of nanoparticles. *Sci. Data* **7**, 101 (2020).
17. Yakubovskiy, P. Segmentation Models Pytorch. *GitHub repository* (2020).
18. Kingma, D. P. & Ba, J. L. Adam: A method for stochastic optimization. in *3rd International Conference on Learning Representations, ICLR 2015 - Conference Track Proceedings* (2015).
